# Supplementary material for: Endosomal-lysosomal organellar assembly (ELYSA) structures coordinate lysosomal degradation systems through mammalian oocyte-to-embryo transition
Source: eLife. 2025 Mar 17;13:RP99358. doi: 10.7554/eLife.99358 (PMC11913445; doi:10.7554/eLife.99358)
Supplement: Figure 2—figure supplement 2—source data 1. [file elife-99358-fig2-figsupp2-data1.xlsx]

## Sheet: A
Figure 2–figure supplement 2A
	Sum of LAMP1 fluorescent intensity
			GV										MII										E2C										L2C
	oocyte ID		G1	G2	G3	G4	G5	G6	G7	G8	G9	G10	M1	M2	M3	M4	M5	M6	M7	M8	M9	M10	E21	E22	E23	E24	E25	E26	E27	E28	E29	E210	L21	L22	L23	L24	L25	L26	L27	L28	L29
	measured volume	calculated diameter
	0-0.004	<0.2	0	0	0	0	0	0	0	0	0	0	0	0	0	0	0	0	0	0	0	0	0	0	0	0	0	0	0	0	0	0	0	0	0	0	0	0	0	0	0
	0.004-0.033	0.2-0.4	646130	560001	506465	529662	547942	789560	3744848	3367319	3639620	502330	148381	219721	323712	482852	375736	755797	453644	426463	917602	442523	280292	203646	296252	515575	249084	177179	361563	292740	303973	198923	91688	104550	107733	197350	79102	171140	196171	126987	164929
	0.033-0.113	0.4-0.6	2060223	2221379	1821225	1839577	1748004	2299208	10383670	10682254	12514456	1781392	446474	635426	913188	1224868	1195055	2356380	1429123	1540200	2599510	1230582	987070	681936	852318	1401791	680389	460398	795862	816511	806711	516179	238270	269614	392395	521949	318098	513574	435841	308153	464436
	0.113-0.268	0.6-0.8	7839111	7929210	6575356	6845258	5178716	8310213	31728077	34503707	34778575	6525834	1608510	2312824	3098858	5904847	4350175	9458878	4952891	6261410	9481544	4644985	4287441	3059055	3684309	5431284	2629605	1661106	2779318	1914674	2177545	2035101	780142	1074522	1598019	1791865	1054963	2075940	1342320	864503	1546180
	0.268-0.523	0.8-1	9772855	9990388	8815466	9719686	6770419	10853052	35979392	41410296	37319036	9682073	2737613	3770979	3529516	9040855	7878947	14988496	7206522	11033687	11599452	7411571	7243311	5172335	6115966	6995475	4486526	2163591	5006262	3637896	3290031	2510096	1780868	2131211	3485054	3092184	1733352	3789976	2213685	1149158	2689307
	0.523-4.2	1-2	44120084	50077362	52684859	41675960	33764578	36372814	95391492	144030022	163115428	38177556	31536631	30480382	21240240	63893468	68005022	94969783	47711783	96423849	122229407	80054422	71481751	50582648	63444866	51651141	26048040	16903601	73532163	44002065	63257983	55491927	29549272	35756545	52763102	34811888	24715185	47011635	52826361	24076161	50095480
	4.2-14.1	2-3	34955866	49900034	48680047	28638781	37077140	20121086	38779509	99924157	87017691	24580550	28638357	29610464	35910158	61676225	85169920	108906316	59933529	83261051	170500811	93237403	65605108	71070495	85881116	80799802	1843075	5070022	26919008	61383044	62568799	47147741	41382440	28059723	33203735	32429607	27299145	38232893	57545456	32336999	83945223
	14.2-33.5	3-4	44715642	62388378	54730699	45668881	66168893	56536684	110116104	215649959	165028733	52271968	23614166	36066110	27679950	71415840	54888821	75462938	65908248	84517558	185898865	102245700	13659860	31656727	56925180	18010447	0	1926179	3146121	13054573	19304133	1520087	13709412	1003026	5831412	13482044	6023515	10675705	9492533	15967034	29958315
	33.5-65.4	4-5	40479488	19353578	34498909	68366237	60768878	88914073	26738418	169624885	141648992	63784060	59912473	36520404	37826343	49969929	82316320	112522812	101949176	81506700	198260310	77705749	5937844	5866014	26397272	4736140	3018261	0	0	7796268	3408644	5073752	2380083	0	2385723	2585332	5501841	2211169	0	5815876	2130494
	65.4-113	5-6	14419993	12038223	16471868	17701123	8807209	6407746	28692197	121911858	22073496	5624056	49083008	88504556	19597386	11516605	59844135	111494347	125841004	67895962	212691498	87455531	46952445	30436001	20467914	5430398	0	0	0	0	5576220	0	0	0	0	0	0	0	0	0	0
	113-179	6-7	0	0	0	12707605	0	0	0	0	0	11755840	50753795	8806461	6037739	31327095	26679556	90766426	59932540	0	106538946	18169208	0	11159238	17061237	0	0	0	0	0	0	0	0	0	0	0	0	0	0	0	0
	179-268	7-8	0	0	0	0	0	0	32131228	0	0	0	27726730	22130436	0	0	0	0	91383408	0	115363856	0	0	0	30427714	0	0	12799828	0	0	0	0	0	0	0	0	0	0	0	0	0
	268-381	8-9	0	0	0	0	18237100	31729278	0	0	53778608	0	18326936	0	0	0	0	0	0	0	30039116	0	31526432	37519200	0	0	0	0	0	0	0	0	0	0	0	0	0	0	0	0	0
	381-523	9-10	0	0	0	0	0	37034152	0	0	0	0	0	0	0	0	0	0	0	0	60883368	0	0	42269992	37257536	24851360	0	0	0	0	0	0	0	0	0	0	0	0	0	0	0
	523-	>10	0	0	0	0	0	0	0	0	0	0	0	0	0	0	0	0	0	0	0	0	0	0	0	0	0	0	0	0	0	0	0	0	0	0	0	0	0	0	0
		total	199009392	214458553	224784894	233692770	239068879	299367866	413684935	841104457	720914635	214685659	294533074	259057763	156157090	306452584	390703687	621682173	566701868	432866880	1227004285	472597674	247961554	289677287	348811680	199823413	38954980	41161904	112540297	132897771	160694039	114493806	89912175	68399191	99767173	88912219	66725201	104682032	124052367	80644871	170994364
	Averaged sum of LAMP1 fluorescent intensity (1/1,000,000)
				GV	MII	E2C	L2C
	measured volume	calculated diameter
	0-0.004	<0.2	µm	0	0	0	0
	0.004-0.033	0.2~0.4	µm	1.48339	0.454643	0.287923	0.137739
	0.033-0.113	0.4~0.6	µm	4.73514	1.35708	0.799917	0.384703
	0.113-0.268	0.6~0.8	µm	15.0214	5.20749	2.96594	1.34761
	0.268-0.523	0.8~1	µm	18.0313	7.91976	4.66215	2.45164
	0.523-4.2	1~2	µm	69.941	65.6545	51.6396	39.0673
	4.2-14.1	2~3	µm	46.9675	75.6844	50.8288	41.6039
	14.2-33.5	3~4	µm	87.3276	72.7698	15.9203	11.7937
	33.5-65.4	4~5	µm	71.4178	83.849	6.22342	2.55672
	65.4-113	5~6	µm	25.4148	83.3924	10.8863	0
	113-179	6~7	µm	2.44634	39.9012	2.82205	0
	179-268	7~8	µm	3.21312	25.6604	4.32275	0
	268-381	8~9	µm	10.3745	4.83661	6.90456	0
	381-523	9~10	µm	3.70342	6.08834	10.4379	0
	523-	>10	µm	0	0	0	0		S
		total	total	360.077	472.776	168.702	99.3433
		number of analyzed oocytes/embryos		10	10	10	9
		number of experiments		3	3	5	3

## Sheet: B
Figure 2–figure supplement 2B
	Intensity/volume of LAMP1+ structures (10,000/ µm3)
			GV										MII										E2C										L2C
	oocyte ID		G1	G2	G3	G4	G5	G6	G7	G8	G9	G10	M1	M2	M3	M4	M5	M6	M7	M8	M9	M10	E21	E22	E23	E24	E25	E26	E27	E28	E29	E210	L21	L22	L23	L24	L25	L26	L27	L28	L29
	measured volume	calculated diameter
	0-0.004	<0.2	0	0	0	0	0	0	0	0	0	0	0	0	0	0	0	0	0	0	0	0	0	0	0	0	0	0	0	0	0	0	0	0	0	0	0	0	0	0	0
	0.004-0.033	0.2-0.4	26463.4	26595.8	21018.6	26653.7	41968.6	57514.6	124895	120261	115705	26925.9	16442.9	20076.8	24201	39708.2	37633.8	39103.7	33753.3	41646.8	40558.8	39967.8	48127.1	37434.9	30962.8	40178.8	39512.1	34178	71511.7	56469.9	65062.7	69846.6	32559.7	32031.2	45495.4	37604.8	32103.1	43130	42869.5	27946.1	36042.2
	0.033-0.113	0.4-0.6	27649.2	27514.1	21767.3	27709.1	42962.2	59254.9	129608	124412	119873	27989.5	16843	20569.3	24949.1	40890.3	38964.9	40466.8	35486.8	42689.7	41530.4	40478.3	49604	38321.8	31902.9	41508.7	40516.2	34554	72430.1	58040.3	66714.4	71394.1	32806	32871.7	46931.6	38628.6	32824.1	43895.2	42948.5	28385.5	36543.9
	0.113-0.268	0.6-0.8	30820.7	30333	23826.8	30443.7	46325	64389.8	141129	136545	131586	30824.4	18730	22279	27175.1	44756.7	42962.6	44924.2	39693.6	46322.8	45073.4	42899.1	54414.7	42823.5	35108.4	46148.7	43716.7	36584.2	78189.3	61725.8	69554.6	75399.2	35243.1	35125.4	49754.6	41818.1	35694.9	47059.6	45817.7	30381.4	39560.4
	0.268-0.523	0.8-1	34785.5	33092.9	25939	33973.7	51209.2	71093.4	154284	148964	145092	34336.3	20432.8	23972.7	28906.3	49130	47153.1	50444.9	44534.7	51406	48446.7	45302.7	58502.5	46059	38652.6	50751.1	47569.1	38375.8	85263.8	66011.5	74443.5	79045.7	37209.2	37034.3	53804.1	44870.2	38967.5	50833.3	49542	32153.3	43497.3
	0.523-4.2	1-2	39808.9	37716.5	31445.1	40022.5	56245.3	76774.9	164357	167174	160797	40572.6	25812.3	28883.9	33441.3	57371.2	56320.6	59252.3	51878.2	62208.4	58174.6	52841.6	69803.7	54527.6	45967	57255.4	51419.7	43886.3	96358.7	75571.4	85647.3	90725	43530.9	43996.1	62997.3	52833.3	43746.9	59083.5	60713	38144.9	53138.6
	4.2-14.1	2-3	49323.2	45202.1	39303.1	49566	64427.5	81444.7	165341	178136	171120	51174.2	32384.7	37776.4	40406.6	70407.3	69119.8	77952.3	63894	81037.5	75183.5	63550.4	79878.9	63955.5	53729.9	65559.9	52379.4	48280.4	99428.6	85345.4	91874.2	103533	48487.7	49428.8	69817.5	59816	52987.3	68856.6	66965.2	43236.7	61050.2
	14.2-33.5	3-4	61180.7	52494.9	50662.4	63069.2	80505.1	98141.9	179300	195657	216008	62597.6	40159.7	49748.8	48965.5	93537	90054.2	105413	81390.8	97505.5	89532.4	78079.4	90706.5	71909.7	59108.8	69000	0	47597.6	95011.7	85562.2	97367.8	103569	50521.9	59421	65733.5	56230	57752.9	71056.7	63400.6	43095.3	64107.2
	33.5-65.4	4-5	74664.9	53969.5	55151.7	76385.4	82803.3	107118	206883	208779	224937	79093.9	52342.9	57746.3	57138.9	111148	104346	120150	96228.5	130975	107464	86072.3	115480	85238.3	59279.1	70411.2	48092.1	0	0	82123	85951	104118	65295.4	0	61513.1	59769.6	69422.1	61592.5	0	43367.4	61224.6
	65.4-113	5-6	62482.1	51863.4	60363.5	84362.2	51697.9	95495.5	183650	211151	271861	84757.1	65276.7	69431.4	63755.2	152032	115831	159366	116920	142749	127045	103861	109255	116157	68140.1	81320.2	0	0	0	0	80571.9	0	0	0	0	0	0	0	0	0	0
	113-179	6-7	0	0	0	79863.8	0	0	0	0	0	80290.7	72527.2	67561.2	34547	131281	174940	159118	115857	0	135394	119188	0	79688.4	61159.3	0	0	0	0	0	0	0	0	0	0	0	0	0	0	0	0
	179-268	7-8	0	0	0	0	0	0	143580	0	0	0	61675.4	86568.4	0	0	0	0	126968	0	139980	0	0	0	113723	0	0	66017.3	0	0	0	0	0	0	0	0	0	0	0	0	0
	268-381	8-9	0	0	0	0	62175.4	105539	0	0	169301	0	67935.9	0	0	0	0	0	0	0	90671.3	0	94305	109969	0	0	0	0	0	0	0	0	0	0	0	0	0	0	0	0	0
	381-523	9-10	0	0	0	0	0	82279.6	0	0	0	0	0	0	0	0	0	0	0	0	149157	0	0	107198	78756.6	54098.1	0	0	0	0	0	0	0	0	0	0	0	0	0	0	0
	523-	>10	0	0	0	0	0	0	0	0	0	0	0	0	0	0	0	0	0	0	0	0	0	0	0	0	0	0	0	0	0	0	0	0	0	0	0	0	0	0	0
		total	407179	358782	329477	512049	580320	899046	1.59303e+06	1.49108e+06	1.72628e+06	518562	490563	484614	383486	790262	777326	856191	806605	696541	1.14821e+06	672241	770077	853283	676491	576232	323205	349474	598194	570850	717187	697631	345654	289909	456047	391571	363499	445507	372256	286711	395164
	Averaged intensity/volume of LAMP1+ structures (10,000/ µm3)
				GV	MII	E2C	L2C
	measured volume	calculated diameter
	0-0.004	<0.2	µm	0	0	0	0
	0.004-0.033	0.2~0.4	µm	5.88002	3.33093	4.93285	3.66424
	0.033-0.113	0.4~0.6	µm	6.08739	3.42869	5.04987	3.7315
	0.113-0.268	0.6~0.8	µm	6.66224	3.74816	5.43665	4.00506
	0.268-0.523	0.8~1	µm	7.32769	4.0973	5.84675	4.31012
	0.523-4.2	1~2	µm	8.14913	4.86184	6.71162	5.09094
	4.2-14.1	2~3	µm	8.95039	6.11713	7.43965	5.78496
	14.2-33.5	3~4	µm	10.5962	7.74386	7.19834	5.90355
	33.5-65.4	4~5	µm	11.6979	9.23612	6.50692	4.69094
	65.4-113	5~6	µm	11.5768	11.1627	4.55444	0
	113-179	6~7	µm	1.60154	10.1041	1.40848	0
	179-268	7~8	µm	1.4358	4.15193	1.79741	0
	268-381	8~9	µm	3.37016	1.58607	2.04274	0
	381-523	9~10	µm	0.822796	1.49157	2.40053	0
	523-	>10	µm	0	0	0	0
		total	total	84.158	71.0604	61.3262	37.1813
		number of analyzed oocytes/embryos		10	10	10	9
		number of experiments		3	3	5	3
