# Supplementary material for: Endosomal-lysosomal organellar assembly (ELYSA) structures coordinate lysosomal degradation systems through mammalian oocyte-to-embryo transition
Source: eLife. 2025 Mar 17;13:RP99358. doi: 10.7554/eLife.99358 (PMC11913445; doi:10.7554/eLife.99358)
Supplement: Figure 2—source data 1. [file elife-99358-fig2-data1.xlsx]

## Sheet: ABCD
Figure 2 ABCD–Source Data 1
(also applied for Figure 6–figure supplement 1)
	Number of LAMP1+ objects
			GV										MII										E2C										L2C
	oocyte ID		G1	G2	G3	G4	G5	G6	G7	G8	G9	G10	M1	M2	M3	M4	M5	M6	M7	M8	M9	M10	E21	E22	E23	E24	E25	E26	E27	E28	E29	E210	L21	L22	L23	L24	L25	L26	L27	L28	L29
	measured volume	calculated diameter
	0-0.004	<0.2	0	0	0	0	0	0	0	0	0	0	0	0	0	0	0	0	0	0	0	0	0	0	0	0	0	0	0	0	0	0	0	0	0	0	0	0	0	0	0
	0.004-0.033	0.2-0.4	763	658	753	621	408	429	937	875	983	583	282	342	418	380	312	604	420	320	707	346	182	170	299	401	197	162	158	162	146	89	88	102	74	164	77	124	143	142	143
	0.033-0.113	0.4-0.6	977	1056	1076	853	527	498	1044	1126	1358	829	332	396	474	387	398	758	528	463	801	385	251	227	348	427	217	172	140	180	156	94	95	106	105	168	123	148	132	136	165
	0.113-0.268	0.6-0.8	1406	1462	1517	1244	633	722	1267	1432	1497	1183	462	567	641	718	562	1163	697	736	1162	595	435	384	572	648	328	252	193	174	173	148	122	167	172	241	160	247	162	156	213
	0.268-0.523	0.8-1	731	782	889	751	352	402	617	742	680	741	348	409	324	475	429	776	424	555	626	420	322	292	410	360	241	146	151	141	114	81	121	147	167	170	111	194	113	94	158
	0.523-4.2	1-2	849	969	1193	832	449	383	530	736	821	753	810	711	441	785	784	1120	635	1092	1358	1021	647	599	866	594	406	280	470	353	406	311	381	490	488	387	362	506	450	359	539
	4.2-14.1	2-3	95	144	178	81	75	30	30	75	67	68	127	103	117	120	164	190	124	137	294	207	119	157	213	176	6	16	45	108	100	71	123	85	76	85	76	78	130	106	192
	14.2-33.5	3-4	34	54	52	31	36	25	29	50	33	36	30	33	27	35	26	36	40	40	97	59	7	24	47	14	0	2	2	8	11	1	15	1	4	12	6	8	7	20	21
	33.5-65.4	4-5	12	9	15	20	18	17	3	19	15	17	22	13	14	10	17	22	25	14	40	21	1	2	11	2	1	0	0	2	1	1	1	0	1	1	2	1	0	3	1
	65.4-113	5-6	3	3	3	3	2	1	2	7	1	1	9	15	4	1	6	8	13	6	19	11	5	3	4	1	0	0	0	0	1	0	0	0	0	0	0	0	0	0	0
	113-179	6-7	0	0	0	1	0	0	0	0	0	1	5	1	1	2	1	4	4	0	6	1	0	1	2	0	0	0	0	0	0	0	0	0	0	0	0	0	0	0	0
	179-268	7-8	0	0	0	0	0	0	1	0	0	0	2	1	0	0	0	0	3	0	4	0	0	0	1	0	0	1	0	0	0	0	0	0	0	0	0	0	0	0	0
	268-381	8-9	0	0	0	0	1	1	0	0	1	0	1	0	0	0	0	0	0	0	1	0	1	1	0	0	0	0	0	0	0	0	0	0	0	0	0	0	0	0	0
	381-523	9-10	0	0	0	0	0	1	0	0	0	0	0	0	0	0	0	0	0	0	1	0	0	1	1	1	0	0	0	0	0	0	0	0	0	0	0	0	0	0	0
	523-	>10	0	0	0	0	0	0	0	0	0	0	0	0	0	0	0	0	0	0	0	0	0	0	0	0	0	0	0	0	0	0	0	0	0	0	0	0	0	0	0
		total	4870	5137	5676	4437	2501	2509	4460	5062	5456	4212	2430	2591	2461	2913	2699	4681	2913	3363	5116	3066	1970	1861	2774	2624	1396	1031	1159	1128	1108	796	946	1098	1087	1228	917	1306	1137	1016	1432
	Average Number of LAMP1+ objects			GV	MII	E2C	L2C					GV	MII	E2C	L2C					GV	MII	E2C	L2C
	measured volume	calculated diameter							measured volume	calculated diameter		/GV	/GV	/GV	/GV		measured volume	calculated diameter		/MII	/MII	/MII	/MII
	0-0.004	<0.2	µm	0	0	0	0		0-0.004	<0.2	µm	0	0	0	0		0-0.004	<0.2	µm	0	0	0	0
	0.004-0.033	0.2~0.4	µm	701	413.1	196.6	117.444		0.004-0.033	0.2~0.4	µm	1	0.589301	0.280456	0.167538		0.004-0.033	0.2~0.4	µm	1.69693	1	0.475914	0.2843
	0.033-0.113	0.4~0.6	µm	934.4	492.2	221.2	130.889		0.033-0.113	0.4~0.6	µm	1	0.526755	0.236729	0.140078		0.033-0.113	0.4~0.6	µm	1.89842	1	0.449411	0.265926
	0.113-0.268	0.6~0.8	µm	1236.3	730.3	330.7	182.222		0.113-0.268	0.6~0.8	µm	1	0.590714	0.267492	0.147393		0.113-0.268	0.6~0.8	µm	1.69287	1	0.452828	0.249517
	0.268-0.523	0.8~1	µm	668.7	478.6	225.8	141.667		0.268-0.523	0.8~1	µm	1	0.715717	0.33767	0.211854		0.268-0.523	0.8~1	µm	1.3972	1	0.471793	0.296002
	0.523-4.2	1~2	µm	751.5	875.7	493.2	440.222		0.523-4.2	1~2	µm	1	1.16527	0.656287	0.585791		0.523-4.2	1~2	µm	0.858171	1	0.563207	0.502709
	4.2-14.1	2~3	µm	84.3	158.3	101.1	105.667		4.2-14.1	2~3	µm	1	1.87782	1.19929	1.25346		4.2-14.1	2~3	µm	0.532533	1	0.638661	0.667509
	14.2-33.5	3~4	µm	38	42.3	11.6	10.4444		14.2-33.5	3~4	µm	1	1.11316	0.305263	0.274854		14.2-33.5	3~4	µm	0.898345	1	0.274232	0.246914
	33.5-65.4	4~5	µm	14.5	19.8	2.1	1.11111		33.5-65.4	4~5	µm	1	1.36552	0.144828	0.0766284		33.5-65.4	4~5	µm	0.732323	1	0.106061	0.0561167
	65.4-113	5~6	µm	2.6	9.2	1.4	0		65.4-113	5~6	µm	1	3.53846	0.538462	0		65.4-113	5~6	µm	0.282609	1	0.152174	0
	113-179	6~7	µm	0.2	2.5	0.3	0		113-179	6~7	µm	1	12.5	1.5	0		113-179	6~7	µm	0.08	1	0.12	0
	179-268	7~8	µm	0.1	1	0.2	0		179-268	7~8	µm	1	10	2	0		179-268	7~8	µm	0.1	1	0.2	0
	268-381	8~9	µm	0.3	0.2	0.2	0		268-381	8~9	µm	1	0.666667	0.666667	0		268-381	8~9	µm	1.5	1	1	0
	381-523	9~10	µm	0.1	0.1	0.3	0		381-523	9~10	µm	1	1	3	0		381-523	9~10	µm	1	1	3	0
	523-	>10	µm	0	0	0	0		523-	>10	µm	-	-	-	-		523-	>10	µm	-	-	-	-
			total	4432	3223.3	1584.7	1129.67				total	1	0.727279	0.357559	0.254889				total	1.37499	1	0.491639	0.350469
		number of analyzed oocytes/embryos		10	10	10	9			number of analyzed oocytes/embryos		10	10	10	9			number of analyzed oocytes/embryos		10	10	10	9
		number of experiments		3	3	5	3			number of experiments		3	3	5	3			number of experiments		3	3	5	3

## Sheet: FG
Figure 2 FG–Source Data 1
	Sum volume of LAMP1+ objects
			GV										MII										E2C										L2C
	oocyte ID		G1	G2	G3	G4	G5	G6	G7	G8	G9	G10	M1	M2	M3	M4	M5	M6	M7	M8	M9	M10	E21	E22	E23	E24	E25	E26	E27	E28	E29	E210	L21	L22	L23	L24	L25	L26	L27	L28	L29
	measured volume	calculated diameter
	0-0.004	<0.2	0	0	0	0	0	0	0	0	0	0	0	0	0	0	0	0	0	0	0	0	0	0	0	0	0	0	0	0	0	0	0	0	0	0	0	0	0	0	0
	0.004-0.033	0.2-0.4	24.416	21.056	24.096	19.872	13.056	13.728	29.984	28	31.456	18.656	9.024	5.664	13.376	12.16	9.984	7.008	13.44	7.36	22.624	8.256	5.824	5.44	9.568	12.832	6.304	5.184	5.056	5.184	4.672	2.848	2.816	3.264	2.368	5.248	2.464	3.968	4.576	4.544	4.576
	0.033-0.113	0.4-0.6	74.513	80.736	83.668	66.389	40.687	38.802	80.116	85.862	104.398	63.645	26.508	17.439	36.602	29.955	30.67	24.111	40.272	22.917	62.593	26.514	19.899	17.795	26.716	33.771	16.793	13.324	10.988	14.068	12.092	7.23	7.263	8.202	8.361	13.512	9.691	11.7	10.148	10.856	12.709
	0.113-0.268	0.6-0.8	254.346	261.405	275.965	224.85	111.791	129.061	224.816	252.691	264.302	211.71	85.879	53.933	114.033	131.932	101.255	77.847	124.778	84.952	210.358	87.463	78.792	71.434	104.941	117.691	60.151	45.405	35.546	31.019	31.307	26.991	22.136	30.591	32.118	42.849	29.555	44.113	29.297	28.455	39.084
	0.268-0.523	0.8-1	280.946	301.889	339.854	286.094	132.211	152.659	233.203	277.989	257.21	281.978	133.981	83.892	122.102	184.019	167.093	103.613	161.818	145.225	239.427	152.684	123.812	112.298	158.229	137.839	94.316	56.379	58.715	55.11	44.195	31.755	47.861	57.547	64.773	68.914	44.482	74.557	44.683	35.74	61.827
	0.523-4.2	1-2	1108.3	1327.73	1675.45	1041.31	600.309	473.759	580.393	861.559	1014.42	940.97	1221.77	520.055	635.15	1113.69	1207.46	551.263	919.688	738.464	2101.08	1160.9	1024.04	927.653	1380.23	902.118	506.577	385.168	763.109	582.258	738.587	611.65	678.812	812.72	837.546	658.9	564.958	795.681	870.1	631.176	942.732
	4.2-14.1	2-3	708.711	1103.93	1238.58	577.791	575.486	247.052	234.542	560.942	508.518	480.331	884.318	514.867	888.72	875.992	1232.21	543.835	938.015	597.327	2267.79	1033.98	821.307	1111.25	1598.39	1232.46	35.187	105.012	270.737	719.231	681.027	455.388	853.462	567.68	475.579	542.156	515.202	555.254	859.334	747.906	1375.02
	14.2-33.5	3-4	730.878	1188.47	1080.3	724.108	821.922	576.071	614.143	1102.19	763.993	835.047	588.007	529.901	565.295	763.504	609.509	492.512	809.775	564.216	2076.33	1165.95	150.594	440.229	963.058	261.021	3.41949e-14	40.468	33.113	152.574	198.26	14.677	271.356	16.88	88.713	239.766	104.298	150.242	149.723	370.505	467.316
	33.5-65.4	4-5	542.149	358.602	625.528	895.017	733.894	830.057	129.244	812.463	629.726	806.435	1144.62	865.793	662.007	449.582	788.876	515.872	1059.45	510.299	1844.89	734.154	51.419	68.819	445.305	67.264	62.76	3.41949e-14	3.41949e-14	94.934	39.658	48.731	36.451	3.41949e-14	38.784	43.255	79.252	35.9	3.41949e-14	134.107	34.798
	65.4-113	5-6	230.786	232.114	272.878	209.823	170.359	67.1	156.233	577.368	81.194	66.355	751.922	207.23	307.385	75.751	516.651	340.265	1076.3	72.608	1674.14	240.117	429.752	262.024	300.38	66.778	3.41949e-14	3.41949e-14	3.41949e-14	1.03917e-13	69.208	3.41949e-14	3.41949e-14	3.41949e-14	3.41949e-14	3.41949e-14	3.41949e-14	3.41949e-14	3.41949e-14	3.41949e-14	3.41949e-14
	113-179	6-7	3.55271e-14	3.55271e-14	2.13163e-13	159.116	5.63105e-13	3.55271e-14	2.84217e-14	7.10543e-15	3.55271e-14	146.416	699.79	157.853	174.769	238.626	152.507	2.22045e-14	517.299	3.55271e-14	786.882	126.846	3.41949e-14	140.036	278.964	1.19016e-13	3.41949e-14	3.41949e-14	3.41949e-14	1.03917e-13	8.9706e-14	3.41949e-14	3.41949e-14	3.41949e-14	3.41949e-14	3.41949e-14	3.41949e-14	3.41949e-14	3.41949e-14	3.41949e-14	3.41949e-14
	179-268	7-8	3.55271e-14	3.55271e-14	2.13163e-13	3.55271e-14	3.55271e-14	3.55271e-14	223.787	7.10543e-15	3.55271e-14	3.55271e-14	449.559	3.55271e-14	3.55271e-14	3.55271e-14	2.85993e-13	2.22045e-14	719.733	3.55271e-14	824.144	1.08358e-13	3.41949e-14	3.41949e-14	267.559	1.19016e-13	1.64313e-13	193.886	3.41949e-14	1.03917e-13	8.9706e-14	3.41949e-14	3.41949e-14	3.41949e-14	3.41949e-14	3.41949e-14	3.41949e-14	3.41949e-14	3.41949e-14	3.41949e-14	3.41949e-14
	268-381	8-9	3.55271e-14	3.55271e-14	2.13163e-13	3.55271e-14	293.317	300.64	2.84217e-14	7.10543e-15	317.65	3.55271e-14	269.768	3.55271e-14	3.55271e-14	3.55271e-14	2.85993e-13	2.22045e-14	1.59872e-14	3.55271e-14	331.297	1.08358e-13	334.303	341.179	3.41949e-14	1.19016e-13	3.41949e-14	3.41949e-14	3.41949e-14	1.03917e-13	8.9706e-14	3.41949e-14	3.41949e-14	3.41949e-14	3.41949e-14	3.41949e-14	3.41949e-14	3.41949e-14	3.41949e-14	3.41949e-14	3.41949e-14
	381-523	9-10	3.55271e-14	3.55271e-14	2.13163e-13	3.55271e-14	3.55271e-14	450.101	2.84217e-14	7.10543e-15	3.55271e-14	3.55271e-14	1.29674e-13	3.55271e-14	3.55271e-14	3.55271e-14	2.85993e-13	2.22045e-14	1.59872e-14	3.55271e-14	408.183	1.08358e-13	3.41949e-14	394.316	473.072	459.376	3.41949e-14	3.41949e-14	3.41949e-14	1.03917e-13	8.9706e-14	3.41949e-14	3.41949e-14	3.41949e-14	3.41949e-14	3.41949e-14	3.41949e-14	3.41949e-14	3.41949e-14	3.41949e-14	3.41949e-14
	523-	>10	3.55271e-14	3.55271e-14	2.13163e-13	3.55271e-14	3.55271e-14	3.55271e-14	3.55271e-14	3.55271e-14	3.55271e-14	3.55271e-14	1.29674e-13	3.55271e-14	3.55271e-14	3.55271e-14	2.85993e-13	2.22045e-14	1.59872e-14	3.55271e-14	0	1.08358e-13	3.41949e-14	3.41949e-14	3.41949e-14	1.19016e-13	3.41949e-14	3.41949e-14	3.41949e-14	1.03917e-13	8.9706e-14	3.41949e-14	3.41949e-14	3.41949e-14	3.41949e-14	3.41949e-14	3.41949e-14	3.41949e-14	3.41949e-14	3.41949e-14	3.41949e-14
		total	3955.04	4875.93	5616.33	4204.37	3493.03	3279.03	2506.46	4559.06	3972.87	3851.54	6265.14	2956.63	3519.44	3875.21	4816.22	2656.33	6380.56	2743.37	12849.7	4736.86	3039.74	3892.47	6006.41	3291.15	782.088	844.826	1177.26	1654.38	1819.01	1199.27	1920.16	1496.88	1548.24	1614.6	1349.9	1671.42	1967.86	1963.29	2938.06
	Average sum volume (um3)								Average vol %
				GV	MII	E2C	L2C					GV	MII	E2C	L2C
	measured volume	calculated diameter							measured volume	calculated diameter
	0-0.004	<0.2	µm	0	0	0	0		0-0.004	<0.2	µm	0	0	0	0
	0.004-0.033	0.2~0.4	µm	22.432	10.8896	6.2912	3.75822		0.004-0.033	0.2~0.4	µm	0.00582987	0.00214364	0.00353735	0.00209151
	0.033-0.113	0.4~0.6	µm	71.8816	31.7581	17.2676	10.2713		0.033-0.113	0.4~0.6	µm	0.0183167	0.00625166	0.00935836	0.00580244
	0.113-0.268	0.6~0.8	µm	221.094	107.243	60.3277	33.1331		0.113-0.268	0.6~0.8	µm	0.0558515	0.021111	0.031682	0.0189132
	0.268-0.523	0.8~1	µm	254.403	149.385	87.2648	55.5982		0.268-0.523	0.8~1	µm	0.0637883	0.0294069	0.0459096	0.0319335
	0.523-4.2	1~2	µm	962.42	1016.95	782.139	754.736		0.523-4.2	1~2	µm	0.233504	0.200189	0.409895	0.424955
	4.2-14.1	2~3	µm	623.589	977.706	702.998	721.288		4.2-14.1	2~3	µm	0.147297	0.192464	0.278439	0.38513
	14.2-33.5	3~4	µm	843.712	816.5	225.399	206.533		14.2-33.5	3~4	µm	0.209999	0.16073	0.0691772	0.105489
	33.5-65.4	4~5	µm	636.312	857.554	87.889	44.7274		33.5-65.4	4~5	µm	0.159578	0.168812	0.0329238	0.0256848
	65.4-113	5~6	µm	206.421	526.237	112.814	4.46556e-14		65.4-113	5~6	µm	0.0500323	0.103591	0.0317041	3.0276e-17
	113-179	6~7	µm	30.5532	285.457	41.9	4.46556e-14		113-179	6~7	µm	0.00758602	0.0561929	0.00824205	-1.01814e-18
	179-268	7~8	µm	22.3787	199.344	46.1445	4.46556e-14		179-268	7~8	µm	0.00892841	0.0392413	0.0274044	3.0276e-17
	268-381	8~9	µm	91.1607	60.1065	67.5482	4.46556e-14		268-381	8~9	µm	0.0255613	0.0118321	0.0197628	-1.01814e-18
	381-523	9~10	µm	45.0101	40.8183	132.676	4.46556e-14		381-523	9~10	µm	0.0137267	0.00803518	0.0319643	3.0276e-17
	523-	>10	µm	0	1.87406e-14	0	0		523-	>10	µm	0	3.68912e-18	0	0
		total	total	4031.37	5079.95	2370.66	1830.05			total	total	1	1	1	1
		number of analyzed oocytes/embryos		10	10	10	9			number of analyzed oocytes/embryos		10	10	10	9
		number of experiments		3	3	5	3			number of experiments		3	3	5	3

## Sheet: HI
Figure 2 HI–Source Data 1
	Number of LAMP1+ objects
		GV										MII
	oocyte ID	G1	G2	G3	G4	G5	G6	G7	G8	G9	G10	M1	M2	M3	M4	M5	M6	M7	M8	M9	M10
	dimeter, distance (to center)
	>3µm, >30µm	43	51	60	51	49	28	30	74	48	50	57	61	40	47	50	64	73	53	128	78
	>4µm, >30µm	14	7	15	23	17	15	4	25	16	19	39	30	18	12	24	34	45	19	64	31
	>5µm, >30µm	2	1	3	4	1	2	1	7	1	2	17	17	5	3	7	12	20	6	31	11
	>3µm, <25µm	3	13	8	1	3	3	4	1	1	1	9	1	2	0	0	2	5	2	13	3
	>4µm, <25µm	1	4	2	1	3	0	2	1	1	0	0	0	0	0	0	0	0	0	1	0
	>5µm, <25µm	1	1	0	0	2	0	2	0	1	0	0	0	0	0	0	0	0	0	0	0
	Average Number of LAMP1+ objects
	dimeter, distance (to center)			GV	MII
	>3µm, peri (>30um)			48.4	65.1
	>4µm, peri			15.5	31.6
	>5µm, peri			2.4	12.9
	>3µm, medi (<25um)			3.8	3.7
	>4µm, medi			1.5	0.1
	>5µm, medi			0.7	0
		number of analyzed oocytes/embryos		10	10
		number of experiments		3	3
