# Supplementary material for: Endosomal-lysosomal organellar assembly (ELYSA) structures coordinate lysosomal degradation systems through mammalian oocyte-to-embryo transition
Source: eLife. 2025 Mar 17;13:RP99358. doi: 10.7554/eLife.99358 (PMC11913445; doi:10.7554/eLife.99358)
Supplement: Figure 4—figure supplement 1—source data 1. [file elife-99358-fig4-figsupp1-data1.xlsx]

## Sheet: 4fs1ACD
Figure 4–figure supplement 1ACD
	Number of LC3+LAMP1+ structures											Number of total LAMP1+ structures											LC3+LAMP1+/total LAMP1+ structures (percentage)
			GV				MII							GV				MII							GV				MII
	oocyte ID		G1'	G2'	G3'	G4'	M1'	M2'	M3'	M4'		oocyte ID		G1'	G2'	G3'	G4'	M1'	M2'	M3'	M4'		oocyte ID		G1'	G2'	G3'	G4'	M1'	M2'	M3'	M4'
	measured volume	calculated diameter										measured volume	calculated diameter										measured volume	calculated diameter
	0-0.004	<0.2	0	0	0	0	0	0	0	0		0-0.004	<0.2	0	0	0	0	0	0	0	0		0-0.004	<0.2	0	0	0	0	0	0	0	0
	0.004-0.033	0.2-0.4	13	30	19	0	4	1	5	6		0.004-0.033	0.2-0.4	674	806	797	498	483	381	575	522		0.004-0.033	0.2-0.4	0.0192878	0.0372208	0.0238394	0	0.00828157	0.00262467	0.00869565	0.0114943
	0.033-0.113	0.4-0.6	14	29	32	0	3	0	0	5		0.033-0.113	0.4-0.6	812	990	1086	642	637	538	686	621		0.033-0.113	0.4-0.6	0.0147783	0.0292929	0.0294659	0	0.00470958	0	0	0.00805153
	0.113-0.268	0.6-0.8	14	77	69	1	1	0	1	1		0.113-0.268	0.6-0.8	1114	1367	1443	871	907	777	902	787		0.113-0.268	0.6-0.8	0.0125673	0.0563277	0.047817	0.00114811	0.00110254	0	0.00110865	0.00127065
	0.268-0.523	0.8-1	24	75	79	1	5	0	2	1		0.268-0.523	0.8-1	570	718	729	501	616	494	679	554		0.268-0.523	0.8-1	0.0421053	0.104457	0.108368	0.00199601	0.00811688	0	0.00294551	0.00180505
	0.523-4.2	1-2	93	234	234	48	30	1	2	9		0.523-4.2	1-2	617	794	815	626	1088	805	1259	931		0.523-4.2	1-2	0.149109	0.290932	0.283436	0.0750799	0.0275735	0.00124224	0.00158856	0.00966702
	4.2-14.1	2-3	76	82	120	49	42	13	25	40		4.2-14.1	2-3	93	88	131	67	163	147	188	176		4.2-14.1	2-3	0.806452	0.920455	0.908397	0.716418	0.257669	0.0884354	0.117021	0.227273
	14.2-33.5	3-4	39	44	34	35	33	19	23	23		14.2-33.5	3-4	39	44	34	37	46	49	45	45		14.2-33.5	3-4	1	1	1	0.891892	0.652174	0.346939	0.488889	0.488889
	33.5-65.4	4-5	9	16	7	9	15	6	13	23		33.5-65.4	4-5	10	16	7	10	17	8	16	26		33.5-65.4	4-5	0.9	1	1	0.9	0.882353	0.75	0.8125	0.769231
	65.4-113	5-6	0	2	0	1	6	7	9	6		65.4-113	5-6	0	2	0	1	6	9	11	7		65.4-113	5-6	0	1	0	1	0.833333	0.555556	0.818182	0.857143
	113-179	6-7	0	1	0	1	0	4	2	0		113-179	6-7	0	1	0	1	0	5	2	0		113-179	6-7	0	1	0	1	0	0.8	1	0
	179-268	7-8	0	0	0	0	0	2	0	1		179-268	7-8	0	0	0	0	0	3	0	1		179-268	7-8	0	0	0	0	0	0.666667	0	1
	268-381	8-9	0	0	0	0	0	0	0	0		268-381	8-9	0	0	0	0	0	0	0	0		268-381	8-9	0	0	0	0	0	0	0	0
	381-523	9-10	0	0	0	0	0	1	0	0		381-523	9-10	0	0	0	0	0	1	0	0		381-523	9-10	0	0	0	0	0	1	0	0
	523-	>10	0	0	0	0	0	0	0	0		523-	>10	0	0	0	0	0	0	0	0		523-	>10	0	0	0	0	0	0	0	0
		total	282	590	594	145	139	54	82	115			total	3929	4826	5042	3254	3963	3217	4363	3670			total	0.0707559	0.121426	0.117017	0.0433313	0.0340651	0.0155424	0.0178776	0.0302452
	Averaged number of LC3+LAMP1+ structures							Averaged number of total LAMP1+ structures						Averaged LC3+LAMP1+/total LAMP1+ structures (percentage)
				GV	MII						GV	MII					GV	MII
	measured volume	calculated diameter						measured volume	calculated diameter					measured volume	calculated diameter
	0-0.004	<0.2	µm	0	0			0-0.004	<0.2	µm	0	0		0-0.004	<0.2	µm	0	0
	0.004-0.033	0.2~0.4	µm	15.5	4			0.004-0.033	0.2~0.4	µm	490.25	693.75		0.004-0.033	0.2~0.4	µm	0.020087	0.00777404
	0.033-0.113	0.4~0.6	µm	18.75	2			0.033-0.113	0.4~0.6	µm	620.5	882.5		0.033-0.113	0.4~0.6	µm	0.0183843	0.00319028
	0.113-0.268	0.6~0.8	µm	40.25	0.75			0.113-0.268	0.6~0.8	µm	843.25	1198.75		0.113-0.268	0.6~0.8	µm	0.0294651	0.000870458
	0.268-0.523	0.8~1	µm	44.75	2			0.268-0.523	0.8~1	µm	585.75	629.5		0.268-0.523	0.8~1	µm	0.0642314	0.00321686
	0.523-4.2	1~2	µm	152.25	10.5			0.523-4.2	1~2	µm	1020.75	713		0.523-4.2	1~2	µm	0.199639	0.0100178
	4.2-14.1	2~3	µm	81.75	30			4.2-14.1	2~3	µm	168.5	94.75		4.2-14.1	2~3	µm	0.83793	0.1726
	14.2-33.5	3~4	µm	38	24.5			14.2-33.5	3~4	µm	46.25	38.5		14.2-33.5	3~4	µm	0.972973	0.494223
	33.5-65.4	4~5	µm	10.25	14.25			33.5-65.4	4~5	µm	16.75	10.75		33.5-65.4	4~5	µm	0.95	0.803521
	65.4-113	5~6	µm	0.75	7			65.4-113	5~6	µm	8.25	0.75		65.4-113	5~6	µm	0.5	0.766053
	113-179	6~7	µm	0.5	1.5			113-179	6~7	µm	1.75	0.5		113-179	6~7	µm	0.5	0.45
	179-268	7~8	µm	0	0.75			179-268	7~8	µm	1	0		179-268	7~8	µm	0	0.416667
	268-381	8~9	µm	0	0			268-381	8~9	µm	0	0		268-381	8~9	µm	0	0
	381-523	9~10	µm	0	0.25			381-523	9~10	µm	0.25	0		381-523	9~10	µm	0	0.25
	523-	>10	µm	0	0			523-	>10	µm	0	0		523-	>10	µm	0	0
		total		402.75	97.5				total		3803.25	4262.75			total		0.0890998	0.0254975
		number of analyzed oocytes/embryos		4	4				number of analyzed oocytes/embryos		4	4			number of analyzed oocytes/embryos		4	4
		number of experiments		2	2				number of experiments		2	2			number of experiments		2	2

## Sheet: 4fs1B
Figure 4–figure supplement 1B
	Sum volume of LC3+LAMP1+ structures (um3)
			GV				MII
	oocyte ID		G1'	G2'	G3'	G4'	M1'	M2'	M3'	M4'
	measured volume	calculated diameter
	0-0.004	<0.2	0	0	0	0	0	0	0	0
	0.004-0.033	0.2-0.4	0.416	0.96	0.608	0	0.128	0.032	0.16	0.192
	0.033-0.113	0.4-0.6	1.166	2.269	2.56	0	0.227	0	0	0.357
	0.113-0.268	0.6-0.8	2.948	15	14.446	0.227	0.227	0	0.13	0.13
	0.268-0.523	0.8-1	9.17	28.639	30.816	0.486	1.912	0	0.81	0.389
	0.523-4.2	1-2	192.295	429.268	442.13	110.062	61.335	1.75	2.074	25.11
	4.2-14.1	2-3	619.6	615.803	974.382	359.004	334.758	140.843	241.25	336.96
	14.2-33.5	3-4	890.207	959.478	725.711	810.987	755.76	417.928	483.766	503.885
	33.5-65.4	4-5	345.262	675.522	294.036	376.886	745.232	304.139	596.291	1078.76
	65.4-113	5-6	1.59872e-13	165.503	0	70.601	493.743	633.226	697.539	488.721
	113-179	6-7	1.59872e-13	167.317	0	128.728	6.28386e-14	500.385	248.702	0
	179-268	7-8	1.59872e-13	7.03881e-14	0	0	6.28386e-14	409.309	3.55271e-14	203.634
	268-381	8-9	1.59872e-13	7.03881e-14	0	0	0	0	0	0
	381-523	9-10	1.59872e-13	7.03881e-14	0	0	0	0	0	0
	523-	>10	0	0	0	0	0	0	0	0
		total	2061.06	3059.76	2484.69	1856.98	2393.32	2840.51	2270.72	2638.14
	Averaged sum volume of LC3+LAMP1+ structures
				GV	MII
	measured volume	calculated diameter
	0-0.004	<0.2	µm	0	0
	0.004-0.033	0.2~0.4	µm	0.496	0.128
	0.033-0.113	0.4~0.6	µm	1.49875	0.146
	0.113-0.268	0.6~0.8	µm	8.15525	0.12175
	0.268-0.523	0.8~1	µm	17.2778	0.77775
	0.523-4.2	1~2	µm	293.439	22.5673
	4.2-14.1	2~3	µm	642.197	263.453
	14.2-33.5	3~4	µm	846.596	540.335
	33.5-65.4	4~5	µm	422.927	681.105
	65.4-113	5~6	µm	59.026	578.307
	113-179	6~7	µm	74.0113	187.272
	179-268	7~8	µm	1.52309e-14	153.236
	268-381	8~9	µm	1.52309e-14	2.72699e-15
	381-523	9~10	µm	1.52309e-14	108.224
	523-	>10	µm	0	0
		total	total	2365.62	2535.67
		number of analyzed oocytes/embryos		4	4
		number of experiments		2	2

## Sheet: 4fs1EF
Figure 4–figure supplement 1EF
	Number of LC3+LAMP1+ structures										Number of total LAMP1+ structures										LC3+LAMP1+/total LAMP1+ structures (percentage)
		GV				MII						GV				MII							GV				MII
	oocyte ID	G1'	G2'	G3'	G4'	M1'	M2'	M3'	M4'		oocyte ID	G1'	G2'	G3'	G4'	M1'	M2'	M3'	M4'		oocyte ID		G1'	G2'	G3'	G4'	M1'	M2'	M3'	M4'
	distance from center (um)										distance from center (um)										measured volume	calculated diameter
	0-5	0	1	2	0	0	0	0	0		0-5	0	1	2	0	3	0	1	1		0-0.004	<0.2	0	1	1	0	0	0	0	0
	5-10	1	1	3	1	0	0	0	0		5-10	5	4	4	26	17	22	10	3		0.004-0.033	0.2-0.4	0.2	0.25	0.75	0.0384615	0	0	0	0
	10-15	8	28	11	1	1	1	0	0		10-15	64	53	37	86	93	84	73	28		0.033-0.113	0.4-0.6	0.125	0.528302	0.297297	0.0116279	0.0107527	0.0119048	0	0
	15-20	19	85	35	5	2	0	2	0		15-20	257	259	134	178	239	248	263	168		0.113-0.268	0.6-0.8	0.07393	0.328185	0.261194	0.0280899	0.0083682	0	0.00760456	0
	20-25	32	100	81	7	14	2	1	1		20-25	598	625	429	380	557	544	686	471		0.268-0.523	0.8-1	0.0535117	0.16	0.188811	0.0184211	0.0251346	0.00367647	0.00145773	0.00212314
	25-30	38	121	122	9	21	4	5	7		25-30	1005	1300	924	629	980	931	1180	989		0.523-4.2	1-2	0.0378109	0.0930769	0.132035	0.0143084	0.0214286	0.00429646	0.00423729	0.00707786
	30-35	71	163	150	42	49	31	24	27		30-35	1181	1882	1525	1031	1555	1172	1566	1347		4.2-14.1	2-3	0.0601185	0.08661	0.0983607	0.0407371	0.0315113	0.0264505	0.0153257	0.0200445
	35-40	81	91	149	55	52	16	50	80		35-40	698	700	1666	892	516	211	583	653		14.2-33.5	3-4	0.116046	0.13	0.0894358	0.0616592	0.100775	0.0758294	0.0857633	0.122511
	>40	32	0	41	25	0	0	0	0		>40	121	2	321	32	3	5	1	10		33.5-65.4	4-5	0.264463	0	0.127726	0.78125	0	0	0	0
	total	282	590	594	145	139	54	82	115		total	3929	4826	5042	3254	3963	3217	4363	3670
	Averaged number of LC3+LAMP1+ structures							Averaged number of total LAMP1+ structures						Averaged LC3+LAMP1+/total LAMP1+ structures (percentage)
				GV	MII						GV	MII					GV	MII
	distance from center (um)							distance from center (um)						distance from center (um)
	0-5			0.75	0			0-5			1.25	0.75		0-5			0.5	0
	5-10			1.5	0			5-10			13	9.75		5-10			0.309615	0
	10-15			12	0.5			10-15			69.5	60		10-15			0.240557	0.00566436
	15-20			36	1			15-20			229.5	207		15-20			0.17285	0.00399319
	20-25			55	4.5			20-25			564.5	508		20-25			0.105186	0.008098
	25-30			72.5	9.25			25-30			1020	964.5		25-30			0.0693077	0.00926004
	30-35			106.5	32.75			30-35			1410	1404.75		30-35			0.0714566	0.023333
	35-40			94	49.5			35-40			490.75	989		35-40			0.0992852	0.0962198
	>40			24.5	0			>40			4.75	119		>40			0.29336	0
	total			402.75	97.5			total			3803.25	4262.75		total			0.0890998	0.0254975
		number of analyzed oocytes/embryos		4	4				number of analyzed oocytes/embryos		4	4			number of analyzed oocytes/embryos		4	4
		number of experiments		2	2				number of experiments		2	2			number of experiments		2	2

## Sheet: 4fs1GH
Figure 4–figure supplement 1GH
	Number of RAB5+LAMP1+ structures										Number of total LAMP1+ structures										RAB5+LAMP1+/total LAMP1+ structures (percentage)
		GV				MII						GV				MII							GV				MII
	oocyte ID	G1''	G2''	G3''	G4''	M1''	M2''	M3''	M4''		oocyte ID	G1''	G2''	G3''	G4''	M1''	M2''	M3''	M4''		oocyte ID		G1''	G2''	G3''	G4''	M1''	M2''	M3''	M4''
	distance from center (um)										distance from center (um)										measured volume	calculated diameter
	0-5	0	1	0	0	0	0	1	0		0-5	0	6	0	0	0	0	10	2		0-0.004	<0.2	0	0.166667	0	0	0	0	0.1	0
	5-10	0	1	4	0	0	0	5	1		5-10	1	27	19	0	3	2	103	11		0.004-0.033	0.2-0.4	0	0.037037	0.210526	0	0	0	0.0485437	0.0909091
	10-15	5	2	3	1	0	0	16	0		10-15	38	62	133	20	61	30	301	57		0.033-0.113	0.4-0.6	0.131579	0.0322581	0.0225564	0.05	0	0	0.0531561	0
	15-20	23	11	22	5	4	0	46	16		15-20	318	179	388	76	186	162	647	240		0.113-0.268	0.6-0.8	0.072327	0.0614525	0.056701	0.0657895	0.0215054	0	0.0710974	0.0666667
	20-25	38	15	26	23	15	9	108	62		20-25	860	413	773	325	513	461	1110	621		0.268-0.523	0.8-1	0.044186	0.0363196	0.0336352	0.0707692	0.0292398	0.0195228	0.0972973	0.099839
	25-30	68	54	57	36	53	33	125	154		25-30	1591	910	1349	861	1053	886	1782	1208		0.523-4.2	1-2	0.0427404	0.0593407	0.0422535	0.0418118	0.0503324	0.037246	0.0701459	0.127483
	30-35	276	121	193	92	118	89	148	212		30-35	1857	1532	1967	1255	1290	1067	2042	1223		4.2-14.1	2-3	0.148627	0.0789817	0.098119	0.0733068	0.0914729	0.0834114	0.072478	0.173344
	35-40	79	154	105	184	9	9	38	6		35-40	403	1250	655	1050	137	116	339	53		14.2-33.5	3-4	0.19603	0.1232	0.160305	0.175238	0.0656934	0.0775862	0.112094	0.113208
	>40	0	30	0	41	0	0	0	0		>40	0	155	1	94	0	2	3	1		33.5-65.4	4-5	0	0.193548	0	0.43617	0	0	0	0
	total	489	389	410	382	199	140	487	451		total	5068	4534	5285	3681	3243	2726	6337	3416				0.0964878	0.0857962	0.0775781	0.103776	0.0613629	0.0513573	0.0768502	0.132026
	Averaged number of RAB5+LAMP1+ structures							Averaged number of total LAMP1+ structures						Averaged RAB5+LAMP1+/total LAMP1+ structures (percentage)
				GV	MII						GV	MII					GV	MII
	distance from center (um)							distance from center (um)						distance from center (um)
	0-5			0.25	0.25			0-5			3	1.5		0-5			0.0416667	0.025
	5-10			1.25	1.5			5-10			29.75	11.75		5-10			0.0618908	0.0348632
	10-15			2.75	4			10-15			112.25	63.25		10-15			0.0590984	0.013289
	15-20			15.25	16.5			15-20			308.75	240.25		15-20			0.0640675	0.0398174
	20-25			25.5	48.5			20-25			676.25	592.75		20-25			0.0462275	0.0614747
	25-30			53.75	91.25			25-30			1232.25	1177.75		25-30			0.0465366	0.0713019
	30-35			170.5	141.75			30-35			1405.5	1652.75		30-35			0.0997586	0.105177
	35-40			130.5	15.5			35-40			161.25	839.5		35-40			0.163693	0.0921454
	>40			17.75	0			>40			1.5	62.5		>40			0.15743	0
	total			417.5	319.25			total			3930.5	4642		total			0.0909095	0.0803991
		number of analyzed oocytes/embryos		4	4				number of analyzed oocytes/embryos		4	4			number of analyzed oocytes/embryos		4	4
		number of experiments		2	2				number of experiments		2	2			number of experiments		2	2
