# Supplementary material for: Endosomal-lysosomal organellar assembly (ELYSA) structures coordinate lysosomal degradation systems through mammalian oocyte-to-embryo transition
Source: eLife. 2025 Mar 17;13:RP99358. doi: 10.7554/eLife.99358 (PMC11913445; doi:10.7554/eLife.99358)
Supplement: Figure 5—source data 1. [file elife-99358-fig5-data1.xlsx]

## Sheet: 5B5fs2A
Figure 5B
Figure 5–figure supplement 2A
	Number of LAMP1+ objects
			DMSO										Latrunculin A										CCB										Nocodazol
	oocyte ID		D1	D2	D3	D4	D5	D6	D7	D8	D9	D10	La1	La2	La3	La4	La5	La6	La7	La8	La9	La10	C1	C2	C3	C4	C5	C6	C7	C8	C9	C10	N1	N2	N3	N4	N5	N6	N7	N8	N9	N10
	measured volume	calculated diameter
	0-0.004	<0.2	0	0	0	0	0	0	0	0	0	0	0	0	0	0	0	0	0	0	0	0	0	0	0	0	0	0	0	0	0	0	0	0	0	0	0	0	0	0	0	0
	0.004-0.033	0.2-0.4	461	497	479	537	644	334	345	419	473	496	380	425	545	641	413	491	314	390	504	667	395	485	564	373	553	551	566	527	673	584	241	463	647	377	445	398	583	302	500	725
	0.033-0.113	0.4-0.6	595	717	680	744	782	473	508	554	684	623	506	581	751	683	511	675	479	517	633	793	572	738	714	563	751	736	768	668	956	799	288	652	837	492	598	522	717	358	698	922
	0.113-0.268	0.6-0.8	1006	1173	1041	1054	1125	812	787	954	1079	1018	877	1040	1188	1094	824	1242	705	942	1044	1275	1157	1202	1275	925	1285	1139	1436	1183	1449	1337	440	957	1357	792	884	722	1035	562	1116	1390
	0.268-0.523	0.8-1	625	886	752	738	858	500	545	754	788	707	693	869	910	741	641	993	648	776	800	917	1006	1090	1044	853	1002	757	1050	730	1119	1104	283	593	867	503	552	414	623	347	779	882
	0.523-4.2	1-2	851	1381	1071	848	1409	558	649	1199	1302	1175	1199	1583	1885	1526	1062	2127	1296	1644	1779	1313	1424	2279	1999	1485	1568	1173	1758	1181	1822	1555	302	826	1286	679	650	463	886	452	1094	1363
	4.2-14.1	2-3	99	157	125	132	192	76	90	124	117	146	139	122	354	300	204	297	184	227	243	147	102	242	276	161	67	85	147	201	249	144	58	101	186	80	100	113	168	56	150	151
	14.2-33.5	3-4	34	44	30	35	22	16	19	53	36	24	30	26	85	72	30	77	20	18	28	39	22	28	47	39	26	18	32	61	70	31	31	49	65	14	26	28	31	28	49	39
	33.5-65.4	4-5	19	15	17	24	13	11	12	25	19	14	14	7	20	17	7	16	5	4	2	3	6	15	18	6	10	6	9	26	18	6	12	13	10	9	18	24	18	12	6	11
	65.4-113	5-6	12	3	4	8	9	16	2	10	8	3	1	1	6	1	0	0	1	1	0	2	0	6	1	0	4	0	2	6	1	0	7	3	5	8	6	3	3	5	4	3
	113-179	6-7	3	1	0	3	2	5	2	1	0	0	0	0	1	1	0	0	0	0	1	0	0	0	0	0	1	0	0	1	0	0	0	0	0	5	0	3	2	2	2	1
	179-268	7-8	1	0	0	2	1	5	0	2	0	0	0	0	0	0	0	0	0	0	0	1	0	0	0	0	0	0	0	1	0	1	0	0	0	3	1	1	2	0	2	0
	268-381	8-9	0	0	0	0	0	1	0	0	1	0	0	0	0	0	0	0	0	0	0	0	0	0	0	0	0	0	0	0	0	0	1	0	0	2	0	0	0	0	0	0
	381-523	9-10	0	0	0	0	0	0	0	0	0	0	0	0	0	0	0	0	0	0	0	0	0	0	0	0	0	0	0	0	0	0	0	0	0	1	0	0	0	0	0	0
	523-	>10	0	0	0	0	0	0	0	0	0	0	0	0	0	0	0	0	0	0	0	0	0	0	0	0	0	0	0	0	0	0	0	0	0	0	0	0	0	0	0	0
		total	3706	4874	4199	4125	5057	2807	2959	4095	4507	4206	3839	4654	5745	5076	3692	5918	3652	4519	5034	5157	4684	6085	5938	4405	5267	4465	5768	4585	6357	5561	1663	3657	5260	2965	3280	2691	4068	2124	4400	5487
	Average Number of LAMP1+ objects			DMSO	LatA	CCB	Noco
	vol.	calculated diameter
	0-0.004	<0.2	µm	0	0	0	0
	0.004-0.033	0.2~0.4	µm	468.5	477	527.1	468.1
	0.033-0.113	0.4~0.6	µm	636	612.9	726.5	608.4
	0.113-0.268	0.6~0.8	µm	1004.9	1023.1	1238.8	925.5
	0.268-0.523	0.8~1	µm	715.3	798.8	975.5	584.3
	0.523-4.2	1~2	µm	1044.3	1541.4	1624.4	800.1
	4.2-14.1	2~3	µm	125.8	221.7	167.4	116.3
	14.2-33.5	3~4	µm	31.3	42.5	37.4	36
	33.5-65.4	4~5	µm	16.9	9.5	12	13.3
	65.4-113	5~6	µm	7.5	1.3	2	4.7
	113-179	6~7	µm	1.7	0.3	0.2	1.5
	179-268	7~8	µm	1.1	0.1	0.2	0.9
	268-381	8~9	µm	0.2	0	0	0.3
	381-523	9~10	µm	0	0	0	0.1
	523-	>10	µm	0	0	0	0
			total	4053.5	4728.6	5311.5	3559.5
		number of analyzed oocytes/embryos		10	10	10	10
		number of experiments		3	4	3	4

## Sheet: 5CD
Figure 5CD
	Number of LAMP1+ objects
		DMSO										Latrunculin A										CCB										Nocodazol
	oocyte ID	D1	D2	D3	D4	D5	D6	D7	D8	D9	D10	La1	La2	La3	La4	La5	La6	La7	La8	La9	La10	C1	C2	C3	C4	C5	C6	C7	C8	C9	C10	N1	N2	N3	N4	N5	N6	N7	N8	N9	N10
	dimeter, distance (to center)
	>4µm, >30µm	35	18	19	37	25	38	16	38	28	17	15	7	27	16	7	16	6	5	3	5	6	21	19	5	15	6	11	33	19	7	20	14	13	28	25	28	25	19	14	15
	>4µm, <25µm	0	1	0	0	0	0	0	0	0	0	0	1	0	3	0	0	0	0	0	1	0	0	0	1	0	0	0	1	0	0	0	0	2	0	0	2	0	0	0	0
	Average Number of LAMP1+ objects
	Diameter, location from center			DMSO	LatA	CCB	Noco
	>4µm, >30µm			27.1	10.7	14.2	20.1
	>4µm, <25µm			0.1	0.5	0.2	0.4
	number of analyzed oocytes/embryos			10	10	10	10
	number of experiments			3	4	3	4

## Sheet: 5fs2B
Figure 5–figure supplement 2B
	Sum volume of LAMP1+ objects
			DMSO										Latrunculin A										CCB										Nocodazol
	oocyte ID		D1	D2	D3	D4	D5	D6	D7	D8	D9	D10	La1	La2	La3	La4	La5	La6	La7	La8	La9	La10	C1	C2	C3	C4	C5	C6	C7	C8	C9	C10	N1	N2	N3	N4	N5	N6	N7	N8	N9	N10
	measured volume	calculated diameter
	0-0.004	<0.2	0	0	0	0	0	0	0	0	0	0	0	0	0	0	0	0	0	0	0	0	0	0	0	0	0	0	0	0	0	0	0	0	0	0	0	0	0	0	0	0
	0.004-0.033	0.2-0.4	14.752	15.904	15.328	17.184	20.608	10.688	11.04	13.408	15.136	15.872	12.16	13.6	17.44	20.512	13.216	15.712	10.048	12.48	16.128	21.344	12.64	15.52	18.048	11.936	17.696	17.632	18.112	16.864	21.536	18.688	7.712	14.816	20.704	12.064	14.24	12.736	18.656	9.664	16	23.2
	0.033-0.113	0.4-0.6	45.971	55.245	52.008	57.448	60.238	36.825	39.484	42.73	52.876	48.239	39.482	45.349	57.743	53.803	39.551	53.059	37.663	40.421	49.177	60.953	44.956	57.378	54.314	43.187	59.183	57.184	59.616	52.636	73.436	62.495	22.944	50.828	64.357	38.476	46.102	39.914	55.021	27.686	54.01	71.866
	0.113-0.268	0.6-0.8	185.314	211.3	188.746	190.618	204.644	147.813	143.985	175.527	197.453	185.93	161.971	192.044	216.866	203.414	151.708	227.511	129.665	177.189	191.696	228.572	212.617	221.05	232.494	172.19	235.875	209.271	265.633	213.62	265.771	247.597	80.762	173.972	249.731	143.744	160.206	130.481	188.357	102.098	203.625	252.342
	0.268-0.523	0.8-1	238.442	345.827	290.007	281.129	328.556	191.072	207.637	290.967	307.917	276.523	273.147	335.15	353.513	287.467	250.398	387.978	256.068	302.793	313.839	354.388	392.651	420.243	403.158	330.838	388.273	290.227	409.525	279.823	432.668	430.015	106.061	232.745	333.595	189.716	209.553	156.508	239.185	130.002	304.024	338.997
	0.523-4.2	1-2	1205.46	1856.79	1439.55	1036.07	1879.64	694.075	844.798	1556.52	1770.84	1655.48	1769.95	2135.51	2756.66	2164.2	1541.55	3098.49	1790.65	2438.5	2718.48	1726	1831.59	3315.02	2949.17	2058.17	2015.63	1544.16	2379.91	1645.83	2435.9	1993.46	400.667	1106.69	1803.42	886.31	860.035	630.679	1197.25	583.459	1433.46	1776.9
	4.2-14.1	2-3	709.368	1132.28	944.249	994.425	1330.64	596.581	619.03	884.774	899.746	1006.09	949.908	852.815	2615.62	2283.62	1491.02	2195.76	1275.23	1504.91	1698.31	1052.45	689.549	1618.05	1889.71	1151.49	492.615	630.179	1026.82	1480.55	1785.6	980.035	431.215	790.398	1363.52	595.59	681.921	848.269	1222.39	400.499	1130.67	1112.22
	14.2-33.5	3-4	748.083	951.932	686.733	819.364	678.923	374.707	428.618	452.691	506.445	545.811	650.625	564.418	1821.11	1505.92	584.403	1669.96	411.911	366.866	561.945	767.977	507.911	594.651	1074.86	805.871	594.781	380.57	672.832	1326.59	1537.61	617.833	329.12	506.411	1385.2	285.937	572.7	613.689	594.02	637.404	1004.5	786.867
	33.5-65.4	4-5	771.12	688.709	775.573	246.661	234.937	525.238	556.858	350.504	176.192	596.873	601.279	298.119	808.541	729.453	326.753	696.583	187.86	201.593	88.679	128.498	269.67	670.498	747.97	272.716	403.55	247.988	406.596	1137.37	815.766	276.696	249.998	313.21	440.187	394.804	773.94	1096.06	807.473	579.248	273.942	530.711
	65.4-113	5-6	1077.14	230.53	320.281	79.024	94.804	1319.56	139.288	1.33227e-13	1.24345e-14	217.566	98.755	65.806	465.134	89.197	9.05942e-14	1.26121e-13	70.925	86.832	6.03961e-14	148.068	1.75859e-13	448.328	76.142	2.61124e-13	315.388	1.26121e-13	163.655	440.771	75.136	2.8777e-13	189.734	1.26121e-13	452.077	680.576	525.398	304.754	227.708	393.693	358.7	255.863
	113-179	6-7	428.295	143.373	1.26121e-13	1.26121e-13	1.26121e-13	777.989	232.049	1.33227e-13	170.651	1.59872e-14	9.41469e-14	7.63833e-14	124.319	138.964	9.05942e-14	1.26121e-13	1.26121e-13	1.26121e-13	157.043	1.26121e-13	1.75859e-13	1.26121e-13	1.26121e-13	2.61124e-13	127.432	1.26121e-13	1.06581e-14	131.414	1.26121e-13	2.8777e-13	1.26121e-13	1.26121e-13	1.26121e-13	669.688	1.33227e-13	395.507	277.442	241.38	254.404	121.889
	179-268	7-8	187.661	1.26121e-13	1.26121e-13	1.26121e-13	1.26121e-13	997.53	1.26121e-13	1.33227e-13	1.24345e-14	1.59872e-14	9.41469e-14	7.63833e-14	7.10543e-14	1.42109e-14	9.05942e-14	1.26121e-13	1.26121e-13	1.26121e-13	6.03961e-14	201.042	1.75859e-13	1.26121e-13	1.26121e-13	2.61124e-13	1.26121e-13	1.26121e-13	1.26121e-13	192.715	1.26121e-13	221.454	1.26121e-13	1.26121e-13	1.26121e-13	607.025	193.331	219.802	443.362	3.35731e-13	435.164	1.26121e-13
	268-381	8-9	1.26121e-13	1.26121e-13	1.26121e-13	1.26121e-13	1.26121e-13	323.158	1.26121e-13	1.33227e-13	1.24345e-14	1.59872e-14	9.41469e-14	7.63833e-14	7.10543e-14	1.42109e-14	9.05942e-14	1.26121e-13	1.26121e-13	1.26121e-13	6.03961e-14	1.26121e-13	1.75859e-13	1.26121e-13	1.26121e-13	2.61124e-13	1.26121e-13	1.26121e-13	1.26121e-13	1.26121e-13	1.26121e-13	2.8777e-13	1.26121e-13	1.26121e-13	1.26121e-13	661.492	1.33227e-13	1.26121e-13	1.26121e-13	1.26121e-13	1.26121e-13	1.26121e-13
	381-523	9-10	1.26121e-13	1.26121e-13	1.26121e-13	1.26121e-13	1.26121e-13	1.59872e-14	1.26121e-13	1.33227e-13	1.24345e-14	1.59872e-14	9.41469e-14	7.63833e-14	7.10543e-14	1.42109e-14	9.05942e-14	1.26121e-13	1.26121e-13	1.26121e-13	6.03961e-14	1.26121e-13	1.75859e-13	1.26121e-13	1.26121e-13	2.61124e-13	1.26121e-13	1.26121e-13	1.26121e-13	1.26121e-13	1.26121e-13	2.8777e-13	1.26121e-13	1.26121e-13	1.26121e-13	447.518	1.33227e-13	1.26121e-13	1.26121e-13	1.26121e-13	1.26121e-13	1.26121e-13
	523-	>10	1.26121e-13	1.26121e-13	1.26121e-13	1.26121e-13	1.26121e-13	1.59872e-14	3.53495e-13	1.33227e-13	1.24345e-14	1.59872e-14	9.41469e-14	7.63833e-14	7.10543e-14	1.42109e-14	9.05942e-14	1.26121e-13	1.26121e-13	1.26121e-13	6.03961e-14	1.26121e-13	1.75859e-13	1.26121e-13	1.26121e-13	2.61124e-13	1.26121e-13	1.26121e-13	1.26121e-13	1.26121e-13	1.26121e-13	2.8777e-13	1.26121e-13	1.26121e-13	1.26121e-13	1.26121e-13	1.26121e-13	1.26121e-13	1.26121e-13	1.26121e-13	1.1724e-13	1.26121e-13
		total	5611.6	5631.89	4712.47	3721.92	4832.99	5995.23	3222.79	3767.12	4097.25	4548.38	4557.28	4502.81	9236.94	7476.55	4398.59	8345.05	4170.02	5131.59	5795.3	4689.28	3961.59	7360.74	7445.87	4846.4	4650.42	3377.22	5402.7	6918.18	7443.42	4848.28	1818.21	3189.07	6112.79	5612.94	4037.43	4448.4	5270.86	3105.13	5468.5	5270.86
	Average sum volume (um3)
				DMSO	LatA	CCB	Noco
	vol.	calculated diameter
	0-0.004	<0.2	µm	0	0	0	0
	0.004-0.033	0.2~0.4	µm	14.992	15.264	16.8672	14.9792
	0.033-0.113	0.4~0.6	µm	49.1064	47.7201	56.4385	47.1204
	0.113-0.268	0.6~0.8	µm	183.133	188.064	227.612	168.532
	0.268-0.523	0.8~1	µm	275.808	311.474	377.742	224.039
	0.523-4.2	1~2	µm	1393.92	2214	2216.89	1067.89
	4.2-14.1	2~3	µm	911.717	1591.96	1174.46	857.669
	14.2-33.5	3~4	µm	619.331	890.513	811.35	671.584
	33.5-65.4	4~5	µm	492.267	406.736	524.882	545.957
	65.4-113	5~6	µm	347.819	102.472	151.942	338.85
	113-179	6~7	µm	175.236	42.0326	25.8846	196.031
	179-268	7~8	µm	118.519	20.1042	41.4169	189.868
	268-381	8~9	µm	32.3158	2.02505e-14	9.64562e-14	66.1492
	381-523	9~10	µm	2.02505e-14	2.02505e-14	2.02505e-14	44.7518
	523-	>10	µm	2.02505e-14	2.02505e-14	9.64562e-14	2.02505e-14
		total	total	4614.16	5830.34	5625.48	4433.42
		number of analyzed oocytes/embryos		10	10	10	10
		number of experiments		3	4	3	4
