# Supplementary material for: Endosomal-lysosomal organellar assembly (ELYSA) structures coordinate lysosomal degradation systems through mammalian oocyte-to-embryo transition
Source: eLife. 2025 Mar 17;13:RP99358. doi: 10.7554/eLife.99358 (PMC11913445; doi:10.7554/eLife.99358)
Supplement: Figure 6—figure supplement 1—source data 1. [file elife-99358-fig6-figsupp1-data1.xlsx]

## Sheet: 6sf1
Figure 6–figure supplement 1
	Number of LAMP1+ objects
			LAMP1-EGFP(mRNA)
	oocyte ID		R1	R2	R3
	measured volume	calculated diameter
	0-0.004	<0.2	0	0	0
	0.004-0.033	0.2-0.4	550	1238	729
	0.033-0.113	0.4-0.6	273	498	257
	0.113-0.268	0.6-0.8	248	365	218
	0.268-0.523	0.8-1	149	247	128
	0.523-4.2	1-2	383	348	289
	4.2-14.1	2-3	117	62	83
	14.2-33.5	3-4	30	26	22
	33.5-65.4	4-5	13	7	10
	65.4-113	5-6	7	3	4
	113-179	6-7	2	5	1
	179-268	7-8	3	0	0
	268-381	8-9	0	1	0
	381-523	9-10	1	0	0
	523-	>10	1	0	0
		total	1777	2800	1741
	Average Number of LAMP1+ objects			LAMP1-EGFP (mRNA)					LAMP1-EGFP (mRNA)
	measured volume	calculated diameter				measured volume	calculated diameter		/MII (in Fig 2)
	0-0.004	<0.2	µm	0		0-0.004	<0.2	µm	0
	0.004-0.033	0.2~0.4	µm	839		0.004-0.033	0.2~0.4	µm	2.03099
	0.033-0.113	0.4~0.6	µm	342.667		0.033-0.113	0.4~0.6	µm	0.696194
	0.113-0.268	0.6~0.8	µm	277		0.113-0.268	0.6~0.8	µm	0.379296
	0.268-0.523	0.8~1	µm	174.667		0.268-0.523	0.8~1	µm	0.364953
	0.523-4.2	1~2	µm	340		0.523-4.2	1~2	µm	0.388261
	4.2-14.1	2~3	µm	87.3333		4.2-14.1	2~3	µm	0.551695
	14.2-33.5	3~4	µm	26		14.2-33.5	3~4	µm	0.614657
	33.5-65.4	4~5	µm	10		33.5-65.4	4~5	µm	0.505051
	65.4-113	5~6	µm	4.66667		65.4-113	5~6	µm	0.507246
	113-179	6~7	µm	2.66667		113-179	6~7	µm	1.06667
	179-268	7~8	µm	1		179-268	7~8	µm	1
	268-381	8~9	µm	0.333333		268-381	8~9	µm	1.66667
	381-523	9~10	µm	0.333333		381-523	9~10	µm	3.33333
	523-	>10	µm	0.333333		523-	>10	µm	0
			total	2106				total	0.653368
		number of analyzed oocytes/embryos		3			number of analyzed oocytes/embryos		3
		number of experiments		2			number of experiments		2
