# Supplementary material for: Endosomal-lysosomal organellar assembly (ELYSA) structures coordinate lysosomal degradation systems through mammalian oocyte-to-embryo transition
Source: eLife. 2025 Mar 17;13:RP99358. doi: 10.7554/eLife.99358 (PMC11913445; doi:10.7554/eLife.99358)
Supplement: Figure 9—source data 1. [file elife-99358-fig9-data1.xlsx]

## Sheet: 9C-6fs1
Figure 9C
(also applied for Figure 9–figure supplement 1)
GV					MII				E2C				4C
um	LysoSensor	Magic Red			um	LysoSensor	Magic Red		um	Magic-Red	LysoSensor		um	Magic-Red	LysoSensor
0	785	165	0		0	532	125		0	168	865		0	113	171
0.36	755.9	191.287	0.36		0.36	568.02	121.415		0.36	172.836	711.568		0.36	111.822	172.517
0.72	772.2	187.571	0.72		0.72	557.6	121.444		0.72	162.362	596.501		0.72	110.309	185.417
1.08	767.44	185.366	1.08		1.08	584.34	123.66		1.08	149.367	512.911		1.08	110.05	225.713
1.44	788.69	186.996	1.44		1.44	590.09	126.909		1.44	146.864	451.547		1.44	113.056	275.973
1.8001	796.65	200.45	1.8001		1.8001	589.22	121.647		1.8001	147.589	397.308		1.8001	114.633	474.548
2.1601	800.18	190.383	2.1601		2.1601	615.17	125.428		2.1601	155.821	401.055		2.1601	114.366	471.023
2.5201	811	184.35	2.5201		2.5201	660.77	131.241		2.5201	150.984	410.442		2.5201	113.621	370.628
2.8801	813.86	190.249	2.8801		2.8801	708.9	130.841		2.8801	140.689	388.68		2.8801	110.831	301.208
3.2401	800.71	186.944	3.2401		3.2401	765.76	144.36		3.2401	147.134	387.669		3.2401	107.73	257.28
3.6001	813.82	179.35	3.6001		3.6001	855.19	143.778		3.6001	138.633	377.101		3.6001	113.065	233.87
3.9601	799.33	185.962	3.9601		3.9601	974.49	153.778		3.9601	140.905	396.086		3.9601	111.6	228.956
4.3201	810.28	197.381	4.3201		4.3201	1064.76	156.471		4.3201	142.728	392.086		4.3201	110.995	278.532
4.6801	884.54	195.14	4.6801		4.6801	1144.46	158.875		4.6801	143.94	381.04		4.6801	112.625	305.145
5.0401	903.77	207.606	5.0401		5.0401	1289.03	157.479		5.0401	137.551	377.166		5.0401	111.914	290.045
5.4002	863.07	192.642	5.4002		5.4002	1501.24	164.279		5.4002	144.291	370.104		5.4002	111.876	261.818
5.7602	896.62	194.359	5.7602		5.7602	1736.56	178.232		5.7602	139.039	356.462		5.7602	115.21	248.208
6.1202	866.33	191.431	6.1202		6.1202	1886.61	189.141		6.1202	138.926	351.76		6.1202	113.893	263.979
6.4802	887.68	192.936	6.4802		6.4802	1928.05	196.491		6.4802	136.995	357.549		6.4802	121.009	363.437
6.8402	903.22	206.871	6.8402		6.8402	2167.17	214.681		6.8402	139.634	367.114		6.8402	134.646	586.436
7.2002	895.43	200.822	7.2002		7.2002	2427.91	217.888		7.2002	135.633	352.935		7.2002	168.887	1044.61
7.5602	919.59	191.771	7.5602		7.5602	3198.91	237.985		7.5602	139.257	372.938		7.5602	228.025	2004.5
7.9202	913.14	186.029	7.9202		7.9202	3992.56	318.578		7.9202	138.652	385.438		7.9202	326.243	3372.96
8.2802	925.74	187.873	8.2802		8.2802	4667.52	510.616		8.2802	141.392	403.544		8.2802	435.176	4865.43
8.6402	995.6	190.568	8.6402		8.6402	4767.01	911.522		8.6402	137.916	389.15		8.6402	480.287	6200.98
9.0003	1018.4	184.887	9.0003		9.0003	4040.51	1072.49		9.0003	150.112	411.3		9.0003	467.526	7093.24
9.3603	1025.43	188.396	9.3603		9.3603	2950.38	768.557		9.3603	146.28	411.8		9.3603	472.803	7330.71
9.7203	1118.11	216.559	9.7203		9.7203	2152.44	333.571		9.7203	142.906	431.615		9.7203	485.531	6710.92
10.0803	1278.17	197.854	10.0803		10.0803	2015.64	235.903		10.0803	139.135	456.687		10.0803	486.733	5586.97
10.4403	1455.97	218.047	10.4403		10.4403	2099.93	218.76		10.4403	146.549	479.771		10.4403	506.031	4838.4
10.8003	1878.67	236.135	10.8003		10.8003	2254.2	228.749		10.8003	152.343	525.627		10.8003	520.383	4439.84
11.1603	2541.5	260.26	11.1603		11.1603	2388.38	228.071		11.1603	154.536	609.523		11.1603	522.206	4262.99
11.5203	3597.39	330.99	11.5203		11.5203	2441.46	244.201		11.5203	153.869	761.391		11.5203	529.684	4170.31
11.8803	4794.63	410.031	11.8803		11.8803	2534.73	253.7		11.8803	161.663	905.79		11.8803	507.675	4127.97
12.2403	5906.27	479.41	12.2403		12.2403	2788.31	261.625		12.2403	191.962	947.343		12.2403	523.954	4466.62
12.6004	6803.07	515.112	12.6004		12.6004	3289.44	269.3		12.6004	189.984	972.216		12.6004	534.057	5300.1
12.9604	7105.73	481.647	12.9604		12.9604	4457.9	270.75		12.9604	194.493	1012.25		12.9604	543.346	5791.15
13.3204	6921.32	464.32	13.3204		13.3204	5620.01	287.053		13.3204	200.704	1077.87		13.3204	536.028	5743.57
13.6804	6460.74	490.993	13.6804		13.6804	6504.2	315.314		13.6804	216.917	1113.65		13.6804	564.903	5589.29
14.0404	5987.43	466.418	14.0404		14.0404	6855.8	351.863		14.0404	198.94	1098.55		14.0404	571.816	5280.92
14.4004	5745.5	467.208	14.4004		14.4004	6787.73	377.294		14.4004	200.207	1042.81		14.4004	548.462	4390.19
14.7604	5132.97	429.453	14.7604		14.7604	6003.92	361.713		14.7604	208.93	1112.37		14.7604	472.183	3519.43
15.1204	4580.23	408.359	15.1204		15.1204	4688.27	293.481		15.1204	219.082	1209.13		15.1204	413.205	3039.51
15.4804	4270.36	424.985	15.4804		15.4804	3416.96	262.246		15.4804	251.088	1240.67		15.4804	413.722	3044.21
15.8404	4216.01	447.267	15.8404		15.8404	2682.73	274.28		15.8404	236.861	1111.13		15.8404	369.903	2842.56
16.2005	4362.41	502.611	16.2005		16.2005	2577.02	261.63		16.2005	215.62	1030.28		16.2005	351.057	2622.3
16.5605	4803.74	593.973	16.5605		16.5605	2526.17	269.751		16.5605	217.142	1041.17		16.5605	328.546	2438.7
16.9205	5130.47	692.594	16.9205		16.9205	2505.7	291.809		16.9205	210.689	1068.06		16.9205	315.248	2131.34
17.2805	5084.94	686.363	17.2805		17.2805	2497.89	300.727		17.2805	207.563	1143.38		17.2805	305.663	1899.3
17.6405	4777.76	588.007	17.6405		17.6405	2377.29	277.75		17.6405	229.053	1347.87		17.6405	291.411	1718.48
18.0005	4215.32	464.773	18.0005		18.0005	2150.12	248.923		18.0005	240.337	1458.82		18.0005	290.591	1856.51
18.3605	3671.59	398.902	18.3605		18.3605	1950.62	248.766		18.3605	246.611	1375.59		18.3605	282.186	1974.12
18.7205	3504.48	381.983	18.7205		18.7205	1928.39	253.566		18.7205	214.56	1102.04		18.7205	303.115	2145.53
19.0805	3365.25	380.452	19.0805		19.0805	1938.62	232.448		19.0805	196.081	926.207		19.0805	340.429	2363.96
19.4405	3431.55	337.282	19.4405		19.4405	1928.58	239.428		19.4405	203.363	947.465		19.4405	336.082	2453.24
19.8006	3482.63	352.561	19.8006		19.8006	1958.21	231.398		19.8006	196.839	962.266		19.8006	365.742	2650.23
20.1606	3300.17	347.768	20.1606		20.1606	1919.03	242.744		20.1606	190.232	1027.67		20.1606	419.948	3277.07
20.5206	2966.02	301.554	20.5206		20.5206	1901.94	250.779		20.5206	193.152	1079.39		20.5206	582.52	4136.76
20.8806	2605.24	303.732	20.8806		20.8806	1892.22	236.332		20.8806	199.062	1023.69		20.8806	874.965	5361.69
21.2406	2414.76	285.947	21.2406		21.2406	1907.52	219.255		21.2406	203.872	1042.42		21.2406	1135.08	6465
21.6006	2407.85	298.225	21.6006		21.6006	2081.11	244.018		21.6006	212.059	1195.12		21.6006	1220.1	6997.58
21.9606	2505.25	318	21.9606		21.9606	2528.63	317.186		21.9606	225.393	1279.63		21.9606	1053.84	6019.02
22.3206	2617.78	321.993	22.3206		22.3206	2881.37	398.562		22.3206	252.53	1242.06		22.3206	681.543	4270.23
22.6806	2914.24	317.445	22.6806		22.6806	2734.2	356.836		22.6806	231.234	1082.44		22.6806	418.026	2969.82
23.0406	3419.18	329.682	23.0406		23.0406	2696.4	276.675		23.0406	217.413	1025.21		23.0406	314.748	2243.72
23.4007	4267.75	357.836	23.4007		23.4007	2563.35	265.474		23.4007	195.25	988		23.4007	280.936	1816.96
23.7607	5120.76	407.435	23.7607		23.7607	2249.79	239.03		23.7607	190.414	979.931		23.7607	264.133	1484.26
24.1207	5816.03	493.99	24.1207		24.1207	1828.54	219.378		24.1207	196.842	979.438		24.1207	254.341	1273.78
24.4807	5745.3	421.26	24.4807		24.4807	1618.75	215.25		24.4807	198.618	977.586		24.4807	242.176	1153.96
24.8407	5244.62	391.871	24.8407		24.8407	1669.3	213.491		24.8407	200.243	988.904		24.8407	221.58	1012.45
25.2007	4939.7	400.191	25.2007		25.2007	2000.57	236.701		25.2007	197.769	993.787		25.2007	212.451	870.589
25.5607	4529.15	444.111	25.5607		25.5607	2288.52	252.256		25.5607	192.121	1029.24		25.5607	206.097	800.854
25.9207	3991.67	437.8	25.9207		25.9207	2229.75	248.502		25.9207	207.259	1082.66		25.9207	197.293	805.008
26.2807	3577.92	423.132	26.2807		26.2807	2122.91	246.64		26.2807	201.517	1168.68		26.2807	193.896	796.993
26.6407	3220.76	376.134	26.6407		26.6407	2139.35	260.229		26.6407	212.751	1228.43		26.6407	201.07	770.246
27.0008	3120.44	346.51	27.0008		27.0008	2170.01	248.603		27.0008	212.51	1296.17		27.0008	205.013	751.212
27.3608	3091.48	320.704	27.3608		27.3608	2024.67	228.715		27.3608	213.405	1393.61		27.3608	196.899	750.425
27.7208	2892.26	322.213	27.7208		27.7208	1937.67	234.343		27.7208	224.471	1638.38		27.7208	193.58	746.991
28.0808	2725.02	333.929	28.0808		28.0808	1936.52	237.35		28.0808	235.92	1842.56		28.0808	198.761	766.685
28.4408	2692.96	311.447	28.4408		28.4408	2042.48	240.388		28.4408	227.452	1918.45		28.4408	210.033	791.92
28.8008	2532.82	283.085	28.8008		28.8008	2258.15	244.907		28.8008	216.858	1950.67		28.8008	211.311	823.953
29.1608	2284.48	253.882	29.1608		29.1608	2656.77	257.066		29.1608	207.148	1978.08		29.1608	225.279	863.908
29.5208	2185.27	270.873	29.5208		29.5208	3116.12	286.065		29.5208	204.37	2071.73		29.5208	217.628	883.027
29.8808	2300.51	284.209	29.8808		29.8808	3494.34	283.991		29.8808	197.45	2079.46		29.8808	225.468	904.047
30.2408	2397.99	263.733	30.2408		30.2408	3548.62	327.265		30.2408	191.97	2002		30.2408	222.663	949.428
30.6009	2584.46	273.245	30.6009		30.6009	2986.16	299.141		30.6009	192.494	1884.27		30.6009	219.119	1003.09
30.9609	2689.48	285.621	30.9609		30.9609	2406.92	278.606		30.9609	187.822	1713.66		30.9609	217.585	1084.79
31.3209	2720.52	293.211	31.3209		31.3209	2005.15	224.702		31.3209	201.836	1463.9		31.3209	220.453	1153.65
31.6809	2580.52	284.615	31.6809		31.6809	1845.46	217.917		31.6809	203.043	1291.61		31.6809	232.271	1226.15
32.0409	2541.63	284.688	32.0409		32.0409	1932.9	228.984		32.0409	195.723	1155.71		32.0409	260.257	1329.17
32.4009	2695.04	302.253	32.4009		32.4009	2075.73	237.711		32.4009	196.811	1078.42		32.4009	275.764	1585.58
32.7609	2734.69	303.038	32.7609		32.7609	2136.14	235.356		32.7609	201.2	1029.28		32.7609	294.889	2127.03
33.1209	2821.77	298.764	33.1209		33.1209	2182.02	226.026		33.1209	182.941	961.984		33.1209	372.896	2877.18
33.4809	2805.85	278.359	33.4809		33.4809	2160.23	241.811		33.4809	182.06	883.699		33.4809	532.825	4054.36
33.8409	2770.04	275.145	33.8409		33.8409	2197.89	268.753		33.8409	174.339	857.018		33.8409	709.884	5676.59
34.201	2388.53	242.624	34.201		34.201	2293.47	277.619		34.201	188.385	900.318		34.201	965.019	7498.43
34.561	2199.79	226.047	34.561		34.561	2835.01	312.329		34.561	189.49	956.775		34.561	1025.47	8218.46
34.921	1825.85	194.006	34.921		34.921	3767.91	332.209		34.921	187.571	959.666		34.921	873.337	7984.06
35.281	1369.53	168.873	35.281		35.281	4768.46	339.146		35.281	186.811	945.008		35.281	748.349	6877.83
35.641	961.92	147.567	35.641		35.641	6148.39	337.548		35.641	189.311	977.243		35.641	652.214	5392.77
36.001	708.09	128.779	36.001		36.001	7568.07	352.213		36.001	195.515	971.018		36.001	511.561	4262.16
36.361	519.76	124.329	36.361		36.361	8703.68	385.938		36.361	197.004	998.084		36.361	495.738	3480.9
36.721	418.9	121.717	36.721		36.721	9546.75	427		36.721	197.392	1031.54		36.721	441.545	3224.48
37.081	351.04	114.997	37.081		37.081	10046.8	455.169		37.081	210.055	1078.71		37.081	399.758	2879.78
37.441	310.29	113.993	37.441		37.441	10243.8	464.246		37.441	241.96	1204.48		37.441	368.136	2515.8
37.8011	287.32	114.671	37.8011		37.8011	9911.66	523.584		37.8011	289.473	1490.08		37.8011	337.909	2149.09
38.1611	272.39	115.131	38.1611		38.1611	9245.3	432.72		38.1611	455.639	1992.58		38.1611	314.318	1857.28
38.5211	248.1	114.732	38.5211		38.5211	8047.46	359.426		38.5211	729.906	2753.26		38.5211	297.071	1973.42
38.8811	247.44	112.688	38.8811		38.8811	6751.05	362.241		38.8811	938.64	3209.59		38.8811	321.814	2374.21
39.2411	224.94	112.631	39.2411		39.2411	5557.3	371.116		39.2411	1092.1	3250.47		39.2411	340.474	2636.35
39.6011	233.94	114.345	39.6011		39.6011	4533.39	362.141		39.6011	1092.38	2834.77		39.6011	330.796	2599.92
39.9611	235.45	117.649	39.9611		39.9611	3521.9	314.881		39.9611	853.451	2015.26		39.9611	305.939	2254.39
40.3211	242.46	114.576	40.3211		40.3211	2755.46	277.125		40.3211	523.006	1357.58		40.3211	279.283	2085.8
40.6811	248.35	114.71	40.6811		40.6811	2396.52	247.723		40.6811	307.728	1090.22		40.6811	245.011	2082.77
41.0411	240.14	114.193	41.0411		41.0411	2229.61	223.138		41.0411	222.724	1056.84		41.0411	240.314	2037.65
41.4012	237.82	111.82	41.4012		41.4012	2022.89	207.656		41.4012	210.735	1089.48		41.4012	238.232	1902.45
41.7612	245.52	111.886	41.7612		41.7612	1795.58	197.382		41.7612	234.034	1198.69		41.7612	231.114	1782.54
42.1212	240.26	109.172	42.1212		42.1212	1551.56	175.923		42.1212	237.61	1303.06		42.1212	256.535	1924.58
42.4812	225.44	109.368	42.4812		42.4812	1319.8	168.81		42.4812	265.884	1467.98		42.4812	301.839	2235.46
42.8412	221.57	109.79	42.8412		42.8412	1232.78	156.938		42.8412	295.169	1659.81		42.8412	406.574	2472
43.2012	236.62	111.005	43.2012		43.2012	1184.92	151.388		43.2012	297.391	1767.82		43.2012	524.502	2642.56
43.5612	235.14	112.41	43.5612		43.5612	1091.67	155.461		43.5612	279.058	1727.77		43.5612	506.869	2593.91
43.9212	251	110	43.9212		43.9212	953.56	154.772		43.9212	290.6	1653.27		43.9212	431.311	2371.18
					44.2812	829.44	146.518		44.2812	301.797	1517.24		44.2812	373.009	2240.22
					44.6413	758.21	139.696		44.6413	282.875	1390.29		44.6413	322.767	2086.93
					45.0013	709.23	136.18		45.0013	240.84	1393.99		45.0013	301.816	2029.9
					45.3613	683.3	135.611		45.3613	222.616	1455.96		45.3613	300.767	2028.54
					45.7213	667.4	133.13		45.7213	238.59	1551.82		45.7213	309.541	2089.98
					46.0813	630.98	129.502		46.0813	251.42	1756.68		46.0813	306.225	2150.45
					46.4413	590.26	131.221		46.4413	297.429	1984.34		46.4413	349.187	2302.17
					46.8013	533.13	128.398		46.8013	331	2105		46.8013	359.015	2497.02
					47.1613	513.3	132.036						47.1613	361.919	2492.78
					47.5213	528.47	131.26						47.5213	354.802	2450.68
					47.8813	520.55	128.078						47.8813	355.166	2411.68
					48.2414	502.68	120.196						48.2414	367.547	2254.47
					48.6014	491.76	123.991						48.6014	343.028	2259.47
					48.9614	449	123						48.9614	346.745	2284.39
													49.3214	368.806	2487.57
													49.6814	369.84	2619.32
													50.0414	408	2838
